# Supplementary material for: Exploring nitrogen remobilization for seed filling using natural variation in Arabidopsis thaliana
Source: PubMed Central journal article supplement — J Exp Bot. 2011 Jan 27;62(6):2131–42. doi: 10.1093/jxb/erq405 (PMC3060690; doi:10.1093/jxb/erq405), 2011-01-27
Supplement: supp_erq405_00053736-file002.pdf [file supp_erq405_00053736-file002.pdf]

Exploring nitrogen remobilization for seed filling using natural variation in *Arabidopsis thaliana*  
 Céline Masclaux-Daubresse and Fabien Chardon

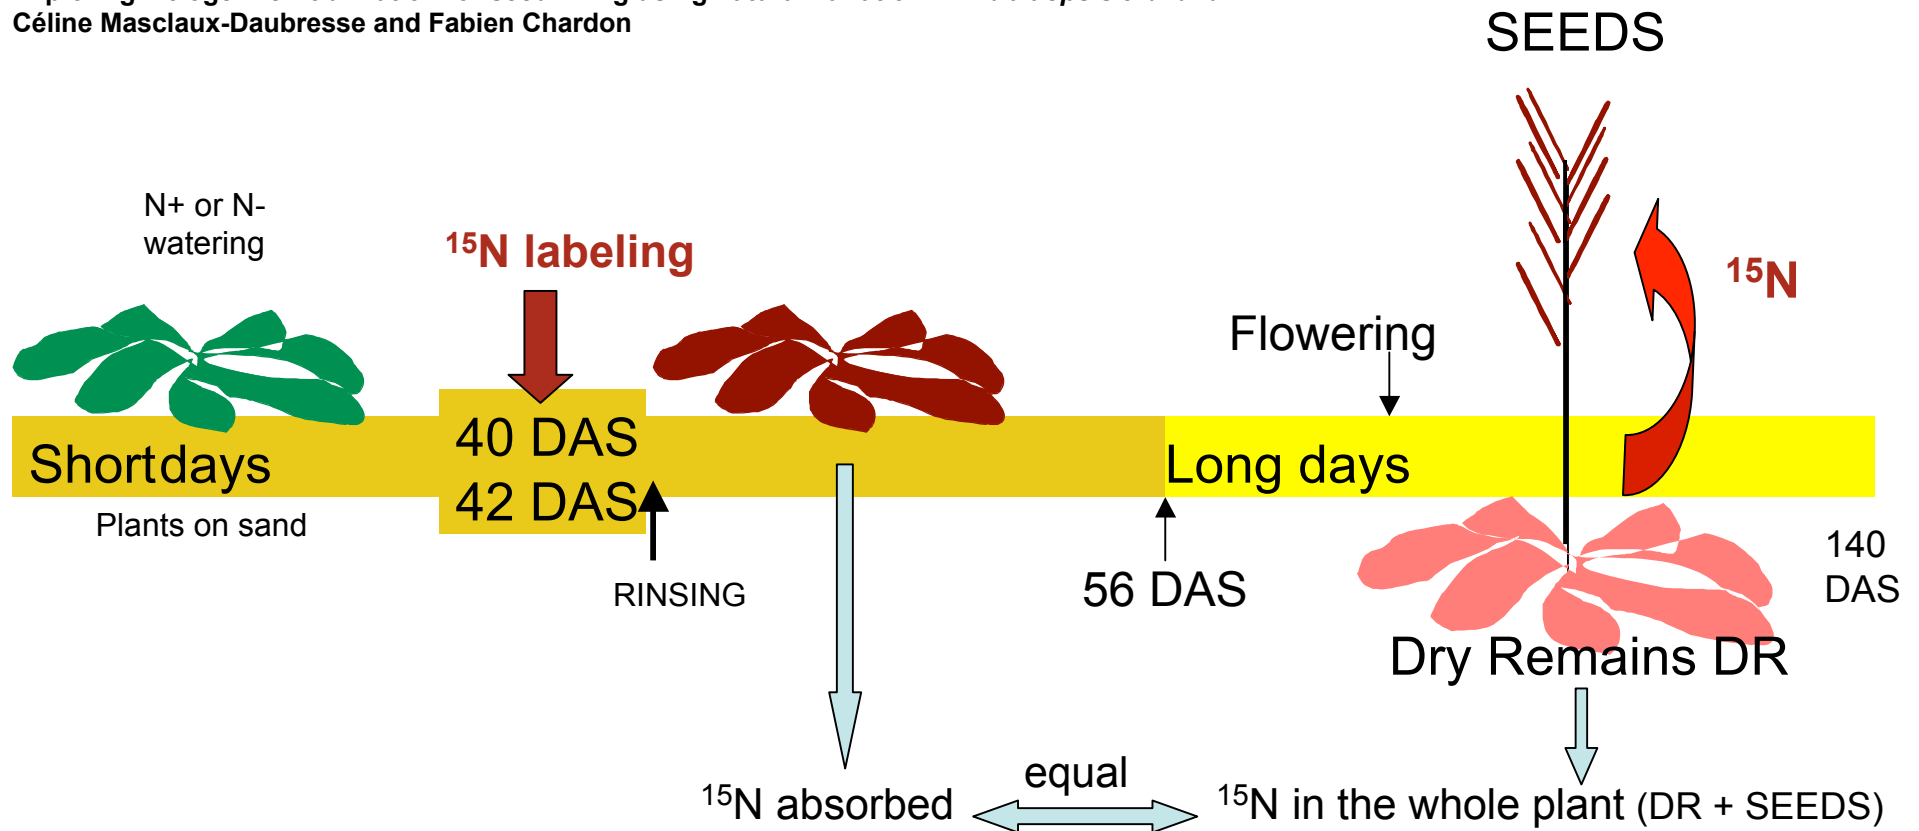

Supplemental Fig.S1: For each accession, four plant repeats and two time repeat were performed. Seeds were sown on sand and grew in short days for 56 days after sowing (DAS) before transfer to long days. Plants were watered three times per week (on Monday, Wednesday and Friday) for 2 hours with nutritive solutions containing 2mM or 10mM nitrate  $^{14}\text{NO}_3^-$ . At days 40 and 42 after sowing, the unlabelled watering solutions were replaced by the labelled 2mM or 10mM nitrate solutions containing  $^{15}\text{NO}_3^-$  (10% enrichment). Labelled solutions were provided to the plants for 24 hours long. After the 42 DAS labelling time, plants and sand were carefully rinsed several time using deionised water to remove any remaining  $^{15}\text{NO}_3^-$  from the substrate. Plants were then grown until the end of their cycle, using unlabelled 2mM or 10mM nitrate  $^{14}\text{NO}_3^-$  solutions. At the end of plant cycle, when plants were dry, their dry remains (DR) and seeds (SEEDS) were separated to determine their dry weight ( $\text{DW}_{\text{DR}}$  and  $\text{DW}_{\text{SEEDS}}$ ), the dry weight of one seed ( $\text{DW}_{1\text{S}}$ ) and their concentration in nitrogen (N%), carbon (C%) and  $^{15}\text{N}$  (enrichment E%). From measured traits, calculated traits were then computed.

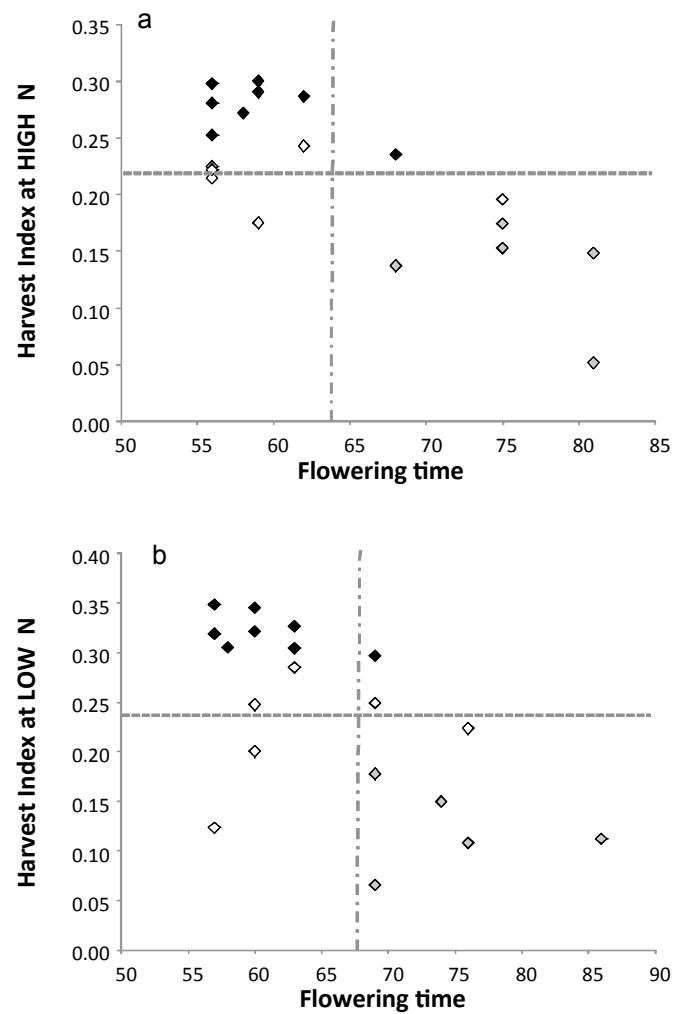

**Supplemental Figure S2:** Correlations between harvest index and flowering time at HIGH N (a) and at LOW N (b) show continuous natural variation between accessions. Values are adjusted means from two biological repeats with four individual plants each. Accessions belonging to HI clusters L, M and H are represented by diamonds with light grey, white and black colours respectively. The horizontal hashed grey lines represent the mean of the core collection at HIGH N and the vertical hashed grey lines represent the mean at LOW N.

**Exploring nitrogen remobilization for seed filling using natural variation in *Arabidopsis thaliana***  
**Céline Masclaux-Daubresse and Fabien Chardon**

**Supplemental Table S1** : *Arabidopsis thaliana* accession provided by the Versailles Genetics and Plant Breeding Laboratory *Arabidopsis thaliana* Resource Centre (INRA Versailles France, <http://dbsgap.verailles.inra.fr/vnat/>). The 16 first accessions listed below are part of the 24 lines core collection defined previously by Mckhann et al. (2004) on the basis of genetic variability. From this 24 lines core collection, the 16 accessions retained have been selected on the basis of their close flowering time in short days. Col-0 and WS which are parental lines for most of the RILs populations and T-DNA mutants available at Versailles Ressource Center were added. Mr-0 was also added.

| Accession name | Versailles identification number (AV) | Original Stock Center number (OSC) | Core collection | RILs populations Versailles (Col-0 as male) | Arabidopsis Identification Stock number (AIS) | City                                   | Country        | Altitude  |
|----------------|---------------------------------------|------------------------------------|-----------------|---------------------------------------------|-----------------------------------------------|----------------------------------------|----------------|-----------|
| Bl-1           | 42                                    | N968                               | 24              |                                             | 1440                                          | Bologna                                | Italy          | 100-200   |
| St-0           | 62                                    | N1534                              | 16              |                                             | 198                                           | Stockholm                              | Sweden         | 1-100     |
| Kn-0           | 70                                    | N1286                              | 24              |                                             | 111                                           | Kaunas                                 | Lithuania      | 1-100     |
| Edi-0          | 83                                    | N1122                              | 24              |                                             | 57                                            | Edinburgh                              | United Kingdom | 1-100     |
| Tsu-0          | 91                                    | N1564                              | 24              | 3 RV                                        | 210                                           | Tsu                                    | Japan          | 1-100     |
| Stw-0          | 92                                    | N1538                              | 24              |                                             | 199                                           | Stobowa/Orel                           | Russia         | 100-200   |
| Mt-0           | 94                                    | N1380                              | 16              |                                             | 153                                           | Martuba/Cyrenaika                      | Libya          | 100-200   |
| Ge-0           | 101                                   | N1186                              | 16              | 17 RV                                       | 1582                                          | Geneva                                 | Switzerland    | 500-600   |
| Ct-1           | 162                                   | N1094                              | 8               | 7 RV                                        | 53                                            | Catania                                | Italy          | 1-100     |
| Bur-0          | 172                                   | N1028                              | 8               | 20 RV                                       | 41                                            | Burren (Eire)                          | Ireland        | 1-100     |
| Mh-1           | 215                                   | N1368                              | 16              |                                             | 1639                                          | M, lhen (OstPr)                        | Poland         | 100-200   |
| Oy-0           | 224                                   | N1436                              | 8               | 27 RV                                       | 933                                           | Oystese                                | Norway         | 1-100     |
| Shahdara       | 236                                   | N929                               | 8               | 13 RV, 33 RV                                |                                               | Shakdara River (Pamir)                 | Tadjikistan    | 3300-3400 |
| Akita          | 252                                   |                                    | 24              |                                             |                                               | Akita Pref.                            | Japan          |           |
| Sakata         | 257                                   |                                    | 24              |                                             |                                               | Sakata, Yamagata Pref.                 | Japan          |           |
| N13            | 266                                   | CS22491                            | 16              |                                             |                                               | Konchezero                             | Russia         |           |
| Mr-0           | 148                                   | N1372                              |                 |                                             | 150                                           | Monte/Tosso                            | Italy          | 1000-1500 |
| Col-0          | 186                                   | N1092                              |                 | 1 to 29 RV                                  | 52                                            | Gorzow Wielkopolski (Landsberg/Warthe) | Poland         | 1-100     |
| WS             | 244                                   | N915                               |                 |                                             |                                               | Wassilewskija                          | Belarus        | 100-200   |

**Exploring nitrogen remobilization for seed filling using natural variation in *Arabidopsis thaliana***  
**Céline Masclaux-Daubresse and Fabien Chardon**

**Supplemental Table S2:** Global ANOVA of dry weight (DW, g), N concentration (N%, mg 100mg<sup>-1</sup> DW), C concentration (C%, mg 100mg<sup>-1</sup> DW), C/N ratio, <sup>15</sup>N enrichment (E%; <sup>15</sup>N/N as %), HI (harvest index), NHI (nitrogen harvest index), <sup>15</sup>NHI (partition of <sup>15</sup>N in seeds), RSA ratio, NUE indicator ( $\Delta$ NHI) and extra-remobilization ( $\Delta$ Rem) in the 19 *Arabidopsis* accessions grown under HIGH N and LOW N nutritions. Sums of square are presented for nutrition effects, genotype effects, repeat effects and nutrition\*genotype, genotype\*repeat, nutrition\* repeat and nutrition\* repeat\*genotype interactions. Only significant effects (P<0.05 at least) are presented.

| Source global             | DW <sub>DR</sub> | N% <sub>DR</sub> | E% <sub>DR</sub> | DW <sub>SEEDS</sub> | DW <sub>1S</sub> | N% <sub>SEEDS</sub> | C% <sub>SEEDS</sub> | C/N <sub>SEEDS</sub> | E% <sub>SEEDS</sub> | HI    | NHI   | <sup>15</sup> NHI | RSA ratio | $\Delta$ NHI | $\Delta$ Rem |
|---------------------------|------------------|------------------|------------------|---------------------|------------------|---------------------|---------------------|----------------------|---------------------|-------|-------|-------------------|-----------|--------------|--------------|
| Nutrition                 | 113.1            | 671.7            | 0.84             | 6.98                | 73.8             | 69.4                | 537.5               | 1197.2               |                     | 0.023 | 0.715 | 2.2               | 4.4       |              |              |
| Genotype                  | 12.15            | 11.8             | 0.77             | 2.19                | 5654             | 11.136              | 960.580             | 176.637              | 0.60                | 1.113 | 0.432 | 3.7               | 6.5       | 1.3          | 2.6          |
| Repeat                    | 0.3              | 3.9              | 0.05             |                     |                  |                     |                     |                      |                     |       | 0.017 |                   | 1.0       |              |              |
| Nutrition*Genotype        | 6.36             | 25.3             | 0.32             | 0.90                | 99.5             | 3.734               | 746.5               | 86.2                 | 0.49                | 0.157 | 0.150 | 0.8               | 3.1       | 0.4          | 1.0          |
| Genotype*Repeat           | 3.1              | 10.7             | 0.24             | 0.30                | 177.3            |                     | 578.6               | 20.8                 | 0.30                | 0.120 | 0.042 | 0.3               |           | 0.3          |              |
| Nutrition*Repeat          |                  | 1.3              |                  |                     |                  |                     | 138.1               | 21.5                 |                     |       | 0.007 |                   |           |              |              |
| Nutrition*Genotype*Repeat | 2.4              | 8.6              | 0.32             |                     |                  | 3.8                 | 391.0               | 23.3                 |                     |       |       |                   |           |              |              |
| Residual                  | 1.13             | 27.7             | 1.05             | 2.01                | 718.7            | 13.3                | 2415                | 113.85               | 1.22                | 0.48  | 0.27  | 1.3               | 4.8       | 1.7          | 3.2          |

**Exploring nitrogen remobilization for seed filling using natural variation in *Arabidopsis thaliana***  
**Céline Masclaux-Daubresse and Fabien Chardon**

**Supplemental Table S3:** ANOVA of dry weight (DW, g), N concentration (N%, mg 100mg<sup>-1</sup> DW), C concentration (C%, mg 100mg<sup>-1</sup> DW), C/N ratio, <sup>15</sup>N enrichment (E%; <sup>15</sup>N/N as %), HI (harvest index), NHI (nitrogen harvest index), <sup>15</sup>NHI (partition of <sup>15</sup>N in seeds), RSA ratio, NUE indicator ( $\Delta$ NHI) and extra-remobilization ( $\Delta$ Rem) in the 19 *Arabidopsis* accessions grown under HIGH N (10mM nitrate) nutrition. Sums of square are presented for genotype effects, repeat effects and genotype\*repeat interactions. Only significant effects (P<0.05 at least) are presented.

| Source<br>HIGH N | DW <sub>DR</sub> | N% <sub>DR</sub> | E% <sub>DR</sub> | DW <sub>SEEDS</sub> | DW <sub>1S</sub> | N% <sub>SEEDS</sub> | C% <sub>SEEDS</sub> | C/N <sub>SEEDS</sub> | E% <sub>SEEDS</sub> | HI   | NHI  | <sup>15</sup> NHI | RSA ratio | $\Delta$ NHI | $\Delta$ Rem |
|------------------|------------------|------------------|------------------|---------------------|------------------|---------------------|---------------------|----------------------|---------------------|------|------|-------------------|-----------|--------------|--------------|
| Genotype         | 16.3             | 29.8             | 0.27             | 2.77                | 2712.9           | 8.8                 | 513.8               | 100.2                | 0.58                | 0.45 | 0.33 | 1.1               | 53        | 1.1          | 2.15         |
| Repeat           |                  | 4.8              | 0.03             |                     |                  |                     | 129.23              | 14.363               |                     |      |      |                   | 0.8       |              |              |
| Genotype*Repeat  | 5.2              | 17.9             | 0.17             |                     | 144.8            |                     | 296.4               |                      |                     |      |      |                   |           | 0.5          |              |
| Residual         | 8.44             | 24.2             | 0.40             | 1.90                | 253.2            | 10.0                | 939.4               | 69.8                 | 0.72                | 0.30 | 0.48 | 0.6               | 2.1       | 0.6          | 1.49         |

**Exploring nitrogen remobilization for seed filling using natural variation in *Arabidopsis thaliana***  
**Céline Masclaux-Daubresse and Fabien Chardon**

**Supplemental Table S4:** ANOVA of dry weight (DW, g), N concentration (N%, mg 100mg<sup>-1</sup> DW), C concentration (C%, mg 100mg<sup>-1</sup> DW), C/N ratio, <sup>15</sup>N enrichment (E%; <sup>15</sup>N/N as %), HI (harvest index), NHI (nitrogen harvest index), <sup>15</sup>NHI (partition of <sup>15</sup>N in seeds), RSA ratio, NUE indicator ( $\Delta$ NHI) and extra-remobilization ( $\Delta$ Rem) in the 19 *Arabidopsis* accessions grown under LOW N (2mM nitrate) nutrition. Sums of square are presented for genotype effects, repeat effects and genotype\*repeat interactions. Only significant effects (P<0.05 at least) are presented.

| Source<br>LOW N | DW <sub>DR</sub> | N% <sub>DR</sub> | E% <sub>DR</sub> | DW <sub>SEEDS</sub> | DW <sub>1S</sub> | N% <sub>SEEDS</sub> | C% <sub>SEEDS</sub> | C/N <sub>SEEDS</sub> | E% <sub>SEEDS</sub> | HI    | NHI  | <sup>15</sup> NHI | RSA ratio | $\Delta$ NHI | $\Delta$ Rem |
|-----------------|------------------|------------------|------------------|---------------------|------------------|---------------------|---------------------|----------------------|---------------------|-------|------|-------------------|-----------|--------------|--------------|
| Genotype        | 2.4              | 7.3              | 0.83             | 0.39                | 3693.1           | 6.9                 | 1094.0              | 168.9                | 0.49                | 0.83  | 3.16 | 3.4               | 0.6       | 0.8          | 1.4          |
| Repeat          | 0.08             | 0.3              |                  | 0.01                | 19.5             |                     |                     | 11.842               |                     |       |      |                   | 0.03      |              |              |
| Genotype*Repeat | 0.7              | 1.2              | 0.44             | 0.13                |                  |                     | 757.4               | 28.2                 | 0.34                | 0.08  |      | 0.2               |           |              |              |
| Residual        | 0.91             | 3.5              | 0.66             | 0.27                | 478.5            | 7.1                 | 1475.5              | 60.4                 | 0.46                | 0.218 | 1.21 | 0.7               | 0.5       | 0.9          | 1.7          |
